# Supplementary material for: Patient-Clinician Communication Interventions Across Multiple Primary Care Sites: A Cluster Randomized Clinical Trial
Source: PubMed Central journal article supplement (PMC11645648; doi:10.1001/jamahealthforum.2024.4436), 2024-12-13
Supplement: jamahealthforum-e244436-s004.pdf [file jamahealthforum-e244436-s004.pdf]

## Data Sharing Statement

Tai-Seale. Patient-Clinician Communication Interventions Across Multiple Primary Care Sites. *JAMA Health Forum*. Published December 13, 2024. doi:10.1001/jamahealthforum.2024.4436

### Data

**Additional Information:** Trial registry: clinicaltrials.gov ClinicalTrials.gov ID: NCT03385512

URL: <https://clinicaltrials.gov/study/NCT03385512>

**Data available:** No
